# Supplementary material for: Tracking Dabbing Using Search Query Surveillance: A Case Study in the United States
Source: PubMed Central journal article supplement (PMC5045525; doi:10.2196/jmir.5802), 2016-09-16
Supplement: jmir_v18i9e252_app1.pdf [file jmir_v18i9e252_app1.pdf]

## Multimedia Appendix 1: The Search Terms for Collecting Google Trends Data

| <b>Dabbing</b>                                                                      |                                                                                          | <b>Cannabis smoking</b>                                                                                                                                                                                                                                                 | <b>Cannabis edibles</b>                                                                                                                                                                                                                                          | <b>ENDS</b>                                                              |                                                                                                         |
|-------------------------------------------------------------------------------------|------------------------------------------------------------------------------------------|-------------------------------------------------------------------------------------------------------------------------------------------------------------------------------------------------------------------------------------------------------------------------|------------------------------------------------------------------------------------------------------------------------------------------------------------------------------------------------------------------------------------------------------------------|--------------------------------------------------------------------------|---------------------------------------------------------------------------------------------------------|
| <b>Dab</b>                                                                          | <b>Hash oil</b>                                                                          |                                                                                                                                                                                                                                                                         |                                                                                                                                                                                                                                                                  | <b>Vaping</b>                                                            | <b>E-cigarette</b>                                                                                      |
| dab rig<br>dab rigs<br>make dabs<br>dab nail<br>dab glass<br>smoke dabs<br>make dab | hash oil<br>marijuana oil<br>thc oil<br>hash wax<br>marijuana wax<br>bho oil<br>make bho | smoking marijuana<br>smoke marijuana<br>marijuana pipes<br>marijuana pipe<br>marijuana bong<br>marijuana joint<br>marijuana bongs<br>marijuana bowl<br>smoke cannabis<br>smoking cannabis<br>marijuana blunt<br>marijuana bowls<br>smokes marijuana<br>marijuana joints | cannabutter<br>marijuana tea<br>marijuana brownies<br>marijuana recipe<br>marijuana butter<br>marijuana recipes<br>marijuana food<br>bhang<br>drinking marijuana<br>eating marijuana<br>drink marijuana<br>marijuana cooking<br>cannabis butter<br>eat marijuana | vape<br>vaping<br>vapes<br>vaporizer pen<br>vaper<br>vapor pen<br>vapers | e cig<br>electronic cigarette<br>e cigarette<br>ecig<br>electronic cigarettes<br>e cigs<br>e cigarettes |
